# Supplementary material for: Long-Acting Thioredoxin Ameliorates Doxorubicin-Induced Cardiomyopathy via Its Anti-Oxidative and Anti-Inflammatory Action
Source: MDPI journal article supplement (doi:10.3390/pharmaceutics14030562), 2022-03-03
Supplement: s1 [file s1]

# Supplementary Materials: Long-Acting Thioredoxin Ameliorates Doxorubicin-Induced Cardiomyopathy via Its Anti-Oxidative and Anti-Inflammatory Action

Ryota Murata, Hiroshi Watanabe, Hiroto Nosaki, Kento Nishida, Hitoshi Maeda, Motohiro Nishida and Toru Maruyama

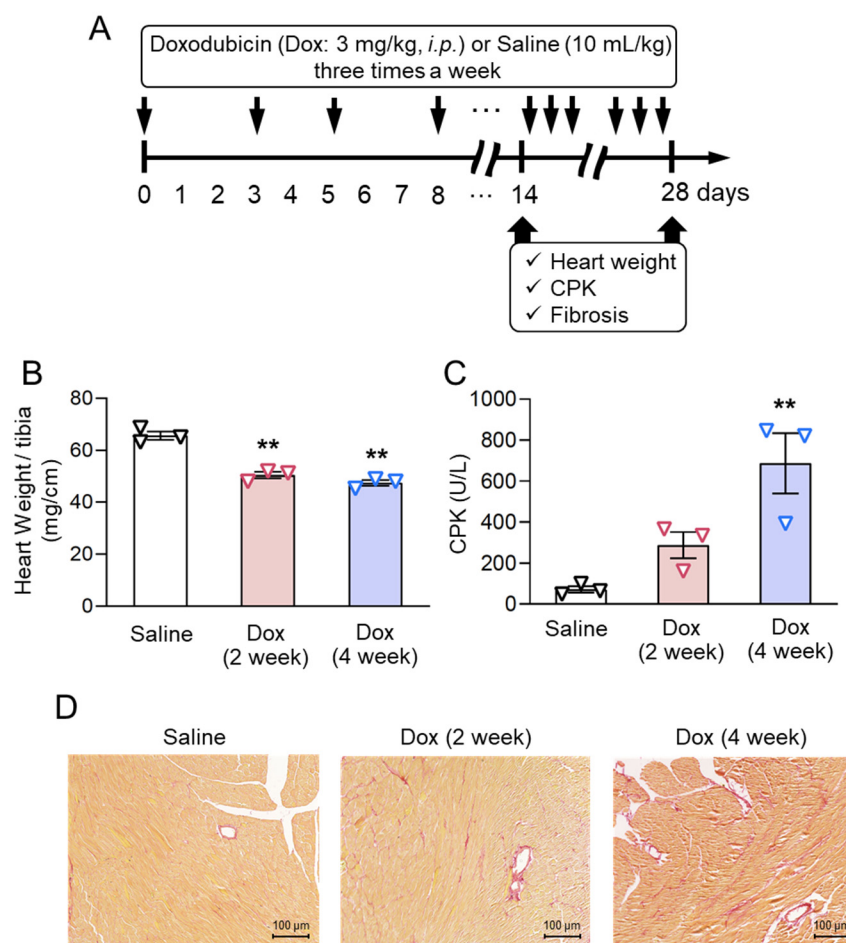

**Figure S1.** Dox-induced cardiomyopathy model mice by the intraperitoneal injection of Dox. **(A)** Experimental protocol for the Dox-induced cardiomyopathy model mice by the intraperitoneal injection of 3 mg/kg Dox three times per week for 4 weeks. **(B)** Changes in heart weight after the injection of Dox. **(C)** Change in the level of creatine phosphokinase (CPK). **(D)** Sirius red-stained heart sections at 2 and 4 weeks after the first injection of Dox. Original magnification: ×200. Scale bars represent 100 μm. Data are expressed as the mean±SE, \*\**p*<0.01.

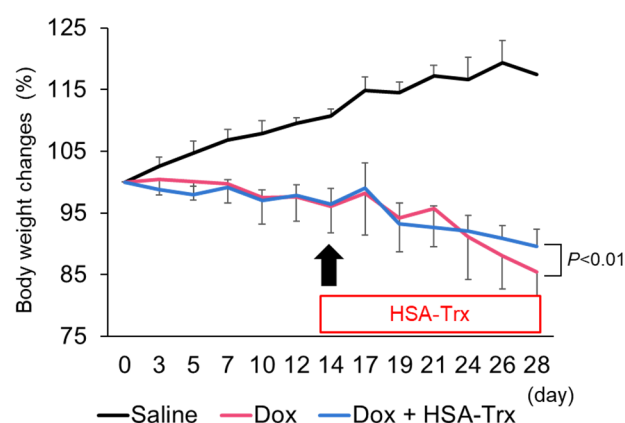

**Figure S2.** The effect of HSA-Trx on body weight decrease in Dox-induced cardiomyopathy model mice. Dox-induced cardiomyopathy was induced by an intraperitoneal injection of 3 mg/kg Dox three times a week for 4 weeks. HSA-Trx (400 nmol/kg) was administered *i.v.* three times per week at 2 weeks after the first injection of Dox. Data are expressed as the mean  $\pm$  SE.

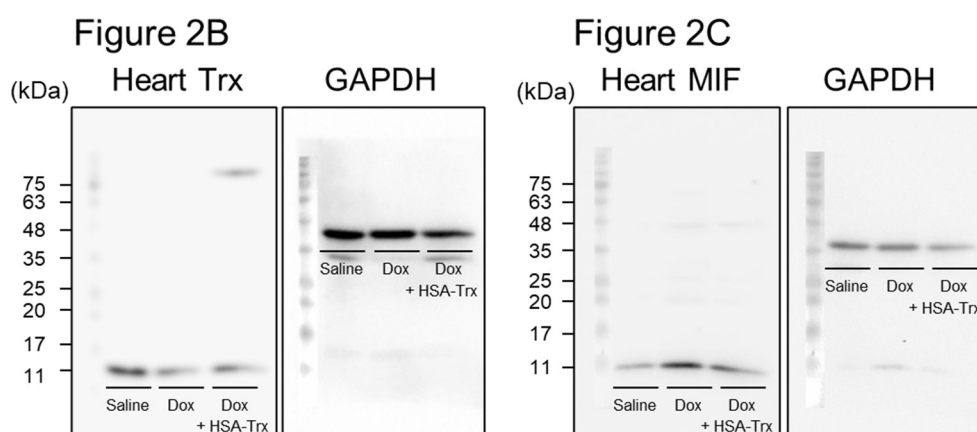

**Figure S3.** Complete Western blot images before cropping into result Figure 2.

**Table S1.** The primers used for mRNA detection.

| Target gene    | Forward (5'→3')           | Reverse (5'→3')           |
|----------------|---------------------------|---------------------------|
| GAPDH          | AAC TTG GCATT GTG GAAGG   | ACACATTGGGGGTAGGAACA      |
| $\alpha$ -SMA  | AGCCATCTTTTCATTGGGATGG    | CCCCTGACAGGACGTTGTTA      |
| TGF- $\beta$   | GGATACCAACTATTGCTTCAGCTCC | AGGCTCCAAATATAGGGGCAGGGTC |
| TNF- $\alpha$  | CATGAGCACAGAAAGCATGATCCG  | AAGCAGGAATGAGAAGAGGCTGAG  |
| IL-6           | TCTCTGCAAGAGACTTCCATCC    | AGACAGGTCTGTTGGGAGTG      |
| IL-10          | GGACAACATACTGCTAACCGACTC  | AAAATCACTCTTCACCTGCTCCAC  |
| iNOS           | GTGGTGACAAGCACATTGG       | AAGGCCAAACACAGCATACC      |
| CD206          | GCCAGAGACATAACAGCA        | CAGGTTTCCTTTCAGTCCT       |
| Atrogin-1      | CAGAGAGGCAGATTTCGCAAG     | GGTGACCCCATACTGCTCTC      |
| Myostatin      | CTGTAACCTTCCCAGGACCA      | TCTTTTGGGTGCGATAATCC      |
| PGC-1 $\alpha$ | TCTCAGTAAGGGGCTGGTTG      | AGCAGCACACTCTATGTCCTC     |
